# Supplementary material
Source: publisher site journal article supplement (https://www.dovepress.com/get_supplementary_file.php?f=380276.docx)
Supplement: Supplementary file 1 [file get_supplementary_file.php]

**Supplemental Table 1:** Comparison of baseline characteristics between enrolled patients and excluded patients

| Patient characteristics | Total  (N=1,816) | Enrolled  (N=974) | Excluded  (N=842) | P value |
| --- | --- | --- | --- | --- |
| Demographics and History |  |  |  |  |
| Age, y | 65.8 (10.4) | 64.7 (10.9) | 67.0 (9.8) | <.001 |
| Men | 1,517 (83.5) | 813 (83.5) | 704 (83.6) | 0.936 |
| Weight, kg | 71.4 (11.1) | 72.0 (11.1) | 70.6 (11.1) | 0.008 |
| Current smoker | 622 (34.3) | 348 (35.7) | 274 (32.5) | 0.153 |
| Hypertension | 952 (52.4) | 521 (53.5) | 431 (51.2) | 0.327 |
| eGFR, mL/min/1.73m2 | 84.5 (25.3) | 85.0 (24.3) | 83.8 (26.4) | 0.302 |
| DM | 641 (35.3) | 333 (34.2) | 308 (36.6) | 0.288 |
| Cerebral vascular disease | 174 (9.6) | 70 (7.2) | 104 (12.4) | <.001 |
| Atrial fibrillation | 87 (4.8) | 45 (4.6) | 42 (5.0) | 0.714 |
| History of MI | 883 (48.6) | 452(46.4) | 431(51.2) | 0.042 |
| History of PCI | 267 (14.7) | 176 (18.1) | 91 (10.8) | <.001 |
| Echocardiography |  |  |  |  |
| Preoperative EF, % | 35.9 (4.6) | 36.3 (4.3) | 35.5 (4.8) | <.001 |
| Preoperative LVESD, mm | 46.5 (8.1) | 46.0 (8.2) | 47.0 (7.8) | 0.005 |
| Preoperative LVEDD, mm | 59.0 (7.3) | 58.5 (7.4) | 59.5 (7.1) | 0.005 |
| Preoperative MR (moderate or severe) | 297 (16.4) | 166 (17.0) | 131 (15.6) | 0.394 |
| Angiography and therapy |  |  |  |  |
| Multi-vessel disease | 1,523 (83.9) | 769 (79.0) | 754 (89.6) | <.001 |
| Left main disease | 144 (7.9) | 58 (6.0) | 86 (10.2) | 0.001 |
| PCI | 687 (37.8) | 556 (57.1) | 131 (15.6) | <.001 |
| CABG | 1,129 (62.2) | 418 (42.9) | 711 (84.4) | <.001 |
| Complete revascularization | 1,068 (58.8) | 527 (54.1) | 541 (64.3) | <.001 |

Abbreviations: CABG, coronary artery bypass grafting; DM, diabetes mellitus; EF, ejection fraction; eGFR, estimated glomerular filtration rate; LVEDD, left ventricular end-diastolic diameter; LVESD, left ventricular end-systolic diameter; MI, myocardial infarction; MR, mitral regurgitation; PCI, percutaneous coronary intervention.
